## Prognostic and clinicopathological significance of microRNA-494 overexpression in cancers: a meta-analysis

Zhenxian Xiang<sup>1,\*</sup>, Min Sun<sup>2,\*</sup>, Zewei Yuan<sup>1</sup>, Chunxiao Zhang<sup>1</sup>, Jun Jiang<sup>1</sup>, Sihao Huang<sup>1</sup> and Bin Xiong<sup>1</sup>

<sup>1</sup>Department of Oncology, Zhongnan Hospital of Wuhan University, Hubei Key Laboratory of Tumor Biological Behaviors and Hubei Cancer Clinical Study Center, Wuhan 430071, P. R. China

<sup>2</sup>Department of General Surgery, Taihe Hospital, Hubei University of Medicine, Shiyan 442000, P. R. China

\*These authors contributed equally to this work

**Correspondence to:** Bin Xiong, **email:** binxiong1961@whu.edu.cn

**Keywords:** meta-analysis, biomarker, hsa-miR-494, cancer, prognosis

**Received:** June 06, 2017

**Accepted:** October 02, 2017

**Published:** November 03, 2017

**Copyright:** Xiang et al. This is an open-access article distributed under the terms of the Creative Commons Attribution License 3.0 (CC BY 3.0), which permits unrestricted use, distribution, and reproduction in any medium, provided the original author and source are credited.

### ABSTRACT

**MicroRNA-494 was revealed as an attractive prognostic biomarker in recent studies. Nevertheless, the prognostic value of microRNA-494 in cancers remains controversial. Current meta-analysis aims to elucidate the precise predictive value of microRNA-494 in various cancers. Eligible studies were identified through multiple search strategies, the hazard ratios (HRs) and their confidence interval (CI) for patient prognostic outcomes were extracted and estimated. The pooled results of fifteen studies indicated that elevated expression of microRNA-494 implies a good overall survival of cancer patients (HR = 0.58, 95% CI: 0.36–0.91); While no significant association was found between the high expression of microRNA-494 and clinicopathological characteristic. Additionally, subgroup analysis revealed that overexpression of microRNA-494 predicted a worse overall survival in non-small cell lung cancer (HR = 2.35, 95% CI: 1.05–5.24) and colorectal cancer (HR = 2.59, 95% CI: 1.62–4.14). As per the subgroup analysis, the cancer type, the anatomy system classification and the ethnic background had influence on the overall survival result. Our findings indicate that elevated expression of microRNA-494 might predict a good overall survival in most cancers, while in non-small cell lung cancer and colorectal cancer, overexpression of microRNA-494 might predict a worse overall survival.**

### INTRODUCTION

Due to population growth and aging, as well as increased adoption of unhealthy lifestyle such as drinking, smoking and “westernized” diets, cancer has become a serious problem of public health throughout the planet [1]. The 5-year relative survival rates for all cancers were 37% among the Chinese and 69% for Americans [2, 3]. Therefore, it is essentially necessary to identify valuable molecular biomarkers to promote early detection, prognostic classification, and novel therapeutic for cancers.

MicroRNAs (miRNAs), which are approximately 18–25 nucleotides in length, bind to complementary sequences of mRNA at the 3'-untranslated region and lead to mRNA degradation or translational repression

[4, 5]. From the first discovery of miRNAs in 1993 to the present day [6], plenty of studies demonstrated that miRNAs participate in numerous biological processes, which include cellular growth, metabolism, differentiation, proliferation, apoptosis, and angiogenesis [7, 8]. Moreover, recent studies had demonstrated that many miRNAs expressed aberrantly in various kinds of cancers, which were further demonstrated to be related to cancer development, progression, and especially carcinogenic treatment [9–12]. Therefore, these miRNAs hold great promise for predicting the cancer patients' prognosis.

Recently, many studies have demonstrated that microRNAs have potential prognostic value. As a gene located on q32-q31 of the fourteenth human chromosome's long arm [13], microRNA-494 (miR-494, miRNA-494) has been reported to be

differentially expressed in various cancers. In Acute Myeloid Leukemia (AML), it has been observed that overexpressed miR-494 was associated with good prognosis [14]. Up to now, overexpressed miR-494 has been reported to be related to good survival in head and neck squamous cell carcinomas (HNSCC) [15], nasopharyngeal carcinoma (NPC) [16], gastric carcinoma (GC) [17], pancreatic carcinoma (PC) [18–20], ovarian cancer (OC) [21], cervical cancer (CC) [22], as well as chondrosarcoma [23]. Meanwhile, there are investigators who get insignificant or even opposite results [24–27]. Therefore, we conducted this meta-analysis, through which we could get all the published articles of miR-494 to comprehensively evaluate the effect of miR-494 on the prognosis of cancer patients.

## RESULTS

### Summary of the included studies

Using the searching strategy described in MATERIALS AND METHODS, we found 89 articles in PubMed, 183 articles in Web of Science and 224 articles in Embase. After we removed the duplicates, we had 299 articles left. Among the remaining 299 articles, two hundred and seventy-eight articles - which included review, letters, laboratory studies, or articles irrelevant to present research - were ruled out further. After we comprehensively assessed

the quality of the remaining 20 articles, fifteen articles were considered eligible for this meta-analysis (Figure 1).

As shown in Table 1, the eligible articles were published from 2014 to 2016 and included a total of 1104 participants with overall survival (OS) data and 440 participants with DFS/PFS/RFS data from China, America, Italy, Iran and Korea. According to their ethnic background, the participants were categorized as Asian or Caucasian. Cancers including pancreatic cancer (PC), non-small cell lung cancer (NSCLC), colorectal cancer (CRC), CC (cervical cancer), chondrosarcoma, gastric cancer (GC), nasopharyngeal carcinoma (NPC), epithelial ovarian cancer (EOC), and head and neck squamous cell carcinoma (HNSCC) were analyzed in this study. Among these studies, three studies ( $n = 216$ ) recruited pancreatic cancer patients, and six studies ( $n = 643$ ) recruited patients with digestive system cancers, which included colorectal cancer, pancreatic cancer, and gastric cancers. All studies measured miR-494 expression in tumor tissue via quantitative real-time polymerase chain reaction (qRT-PCR) or *in situ* hybridization (ISH). Notably, the mean and median value were selected as the cut-off value in most articles.

All the studies investigated the correlation between miR-494 expression and OS; among them, two emphasized disease free survival (DFS) [25–26], only one study focused on recurrence free survival (RFS) [14] and one focused on progress free survival (PFS) [24].

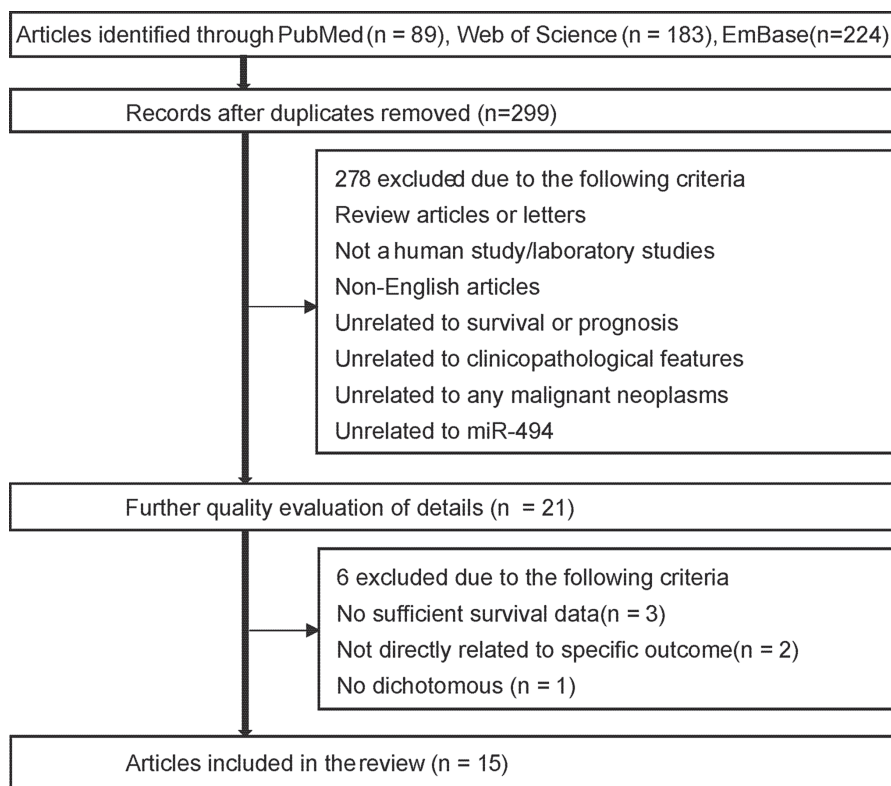

**Figure 1: Flow chart of study selection process.** In the flow chart, there are two wrong words (survival and unrelated), we will send the Figure 1 again.

**Table 1: Main characteristics of 15 studies after screening**

| First Author   | Year of Publication | Country | Study Design | Type of Cancer | Sample type  | Number | Stage | miR-494 Assay        | Cut-off Value     | Survival Analysis | Source of HR | Maximum Follow-up |
|----------------|---------------------|---------|--------------|----------------|--------------|--------|-------|----------------------|-------------------|-------------------|--------------|-------------------|
| Han [21]       | 2016                | China   | R            | OC             | FTT          | 50     | I-IV  | qRT-PCR (SYBR Green) | mean value        | OS                | SC           | 80 months         |
| Ma [18]        | 2015                | China   | R            | PC             | FTT          | 99     | I-IV  | qRT-PCR (SYBR Green) | median value      | OS                | Reported     | 60 months         |
| Liu [20]       | 2015                | China   | R            | PC             | Fresh tissue | 87     | I-IV  | qRT-PCR (SYBR Green) | mean value        | OS                | SC           | 40 months         |
| Li [19]        | 2014                | USA     | R            | PC             | FFPE         | 50     | I-IV  | qRT-PCR (Taqman)     | median value      | OS                | SC           | 60 months         |
| Wang [27]      | 2015                | China   | R            | NSCLC          | FFPE         | 92     | I-IV  | ISH                  | NR                | OS                | SC           | 98 months         |
| Sun [24]       | 2014                | China   | R            | CRC            | Tissue (-)   | 247    | I-IV  | qRT-PCR (Taqman)     | median value      | OS/PFS            | Reported     | 60 months         |
| Li [23]        | 2015                | China   | P            | CS             | Tissue (-)   | 71     | I-IV  | qRT-PCR (Taqman)     | mean value        | OS                | Reported     | 60 months         |
| Dadpay [16]    | 2015                | Iran    | R            | NPC            | FTT          | 34     | I-IV  | qRT-PCR (Taqman)     | median value      | OS                | Reported     | 120 months        |
| Faversani [25] | 2016                | Italy   | R            | NSCLC          | Tissue (-)   | 113/57 | I-III | qRT-PCR (Taqman)     | median value      | OS/DFS            | Reported     | 70 months         |
| Yang [26]      | 2016                | China   | P            | CRC            | FTT          | 104    | I-IV  | qRT-PCR (Taqman)     | 3.05              | OS/DFS            | SC           | 65 months         |
| Chang [15]     | 2015                | China   | P            | HNC            | Fresh tissue | 45     | I-IV  | qRT-PCR (Taqman)     | mean value        | OS                | SC           | 65 months         |
| Chen [14]      | 2016                | China   | P            | AML            | Fresh tissue | 32     | I-IV  | qRT-PCR (Taqman)     | mean value        | OS/RFS            | SC           | 42 months         |
| He [17]        | 2014                | China   | P            | GC             | FTT          | 56     | I-IV  | qRT-PCR (Taqman)     | 0.8 times control | OS                | SC           | 60 months         |
| Lee [22]       | 2014                | Korea   | R            | CC             | FFPE         | 24     | I-IV  | qRT-PCR (Taqman)     | mean value        | OS                | SC           | 135 months        |
| Li [34]        | 2015                | China   | R            | OC             | FTT          | 40     | I-IV  | qRT-PCR (Taqman)     | mean value        | -                 | -            | -                 |

Study design is described as prospective (P) or retrospective (R).

Abbreviations: miR-494, microRNA-494; HR, Hazard Ratio; NR, not reported; q-PCR, quantitative real-time polymerase chain reaction; OS, overall survival; PC, pancreatic cancer; OC, ovarian cancer; NSCLC, non-small lung cancer; CRC, colorectal carcinoma; AML, Acute myeloid leukemia; NPC, nasopharyngeal carcinoma. GC, gastric cancer. CC, cervical cancer. EOC, Epithelial ovarian cancer. HNSCC, Head and neck squamous cell carcinoma. CS, chondrosarcoma. ISH, *in situ* hybridization. SC, survival cur. PFS, progress free survival. DFS, disease free survival. RFS, recurrence free survival. FFPE, formalin-fixed paraffin-embedded. FTT, Frozen tumor tissue. -, not mentioned.

## Correlation between miR-494 expression and prognosis

Due to the presence of heterogeneity among the studies, all of which related to OS, HR and its 95% CI for OS were pooled via random effects model ( $P < 0.001$ ,  $I^2 = 81.7\%$ ) (Figure 2, Table 2). The result revealed that increased expression of miR-494 was an indicator of good OS in various human cancer, with the pooled HR of 0.58 (95% CI: 0.36–0.91) (Figure 2, Table 2).

## Subgroup analysis

In order to explain the source of heterogeneity in OS, subgroup analysis was performed according to ethnicity (Asian or Caucasian), main pathologic type (Adenocarcinoma or Squamous-cell carcinoma), cancer type, tissue type (Frozen tumor tissue, Fresh tissue, formalin-fixed paraffin-embedded), microRNA assay method (ISH, taqman qRT-PCR, SYBR Green qRT-PCR) and human anatomy system series. To begin with, twelve studies in Asians revealed that elevated expression of miR-494 implies an obviously better OS (HR = 0.52; 95% CI: 0.32–0.85;  $I^2 = 81.6\%$ ,  $P = 0.000$ ) via a random-effects model, which was used considering the evident heterogeneity ( $I^2 = 81.6\%$ ,  $P < 0.001$ ) among included studies (Figure 3A, Table 2). By merging two studies, we did not find significant correlation between the OS of Caucasians and high miR-494 expression (HR = 1.08; 95% CI: 0.18–6.33;  $I^2 = 89.6\%$ ,  $P = 0.002$ ) (Figure 3A, Table 2). As for main pathologic type, no significant association was observed between miR-494 expression and squamous

cell carcinoma and adenocarcinoma (Supplementary Figure 1A). When the eligible studies were classified in accordance with cancer type, as Figure 3B showed, the Pooled HR of PC was 0.47 (95% CI: 0.33–0.68;  $I^2 = 0.0\%$ ,  $P = 0.681$ ), indicating that elevated expression of miR-494 was an indicator of good prognosis in PC. While in NSCLC and CRC (Figure 3B, Table 2), elevated expression of miR-494 was indicator of worse outcome, with the HRs of 2.35 (95% CI: 1.05–5.24;  $I^2 = 0.0\%$ ,  $P = 0.535$ ) and 2.59 (95% CI: 1.62–4.14;  $I^2 = 0.0\%$ ,  $P = 0.394$ ) respectively. It was obvious that high expression of miR-494 predicted a good OS in the solid tumor and leukemia as per the cancer type (Figure 3C, Table 2). We also found that elevated expression of miR-494 predicted a good OS in Frozen tumor tissue (FTT), formalin-fixed paraffin-embedded (FFPE) and fresh tumor tissue (Figure 3D); but no significant association was found in Tissue which was preserved through unclear method (-) (Supplementary Figure 4). In the subgroup classified as microRNA assay method, we found that elevated expression of miR-494 predicted a good OS in SYBR Green qRT-PCR subgroup; but no significant association was found in taqman qRT-PCR and ISH (Supplementary Figure 5A).

Furthermore, we also categorized the cancer according to the human anatomy system, such as digestive system cancer, respiratory system neoplasms and reproductive system neoplasms. As an obvious heterogeneity existed among the OS of the digestive system and respiratory system neoplasms (Supplementary Figure 1B, Table 2), a random effects model was used to pool the HRs. The results showed that elevated expression

**Table 2: Meta-analysis of overall and subgroup analysis for miR-494 expression and OS in cancers**

| Category                        | Studies | HR ( 95% CI )      | Model  | Heterogeneity      |         |
|---------------------------------|---------|--------------------|--------|--------------------|---------|
|                                 |         |                    |        | I <sup>2</sup> (%) | P       |
| <b>OS</b>                       | 14      | 0.58 (0.36-0.91)   | Random | 81.7               | < 0.001 |
| <b>Subgroup analysis for OS</b> |         |                    |        |                    |         |
| <b>Ethnic background</b>        |         |                    |        |                    |         |
| Asian                           | 12      | 0.52 ( 0.32–0.8)   | Random | 81.6               | 0.000   |
| Caucasian                       | 2       | 1.08 ( 0.18–6.33)  | Random | 89.6               | 0.002   |
| <b>Main pathological type</b>   |         |                    |        |                    |         |
| Adenocarcinoma                  | 7       | 0.66 ( 0.34–1.28)  | Random | 86.4               | 0.000   |
| Squamous-cell carcinoma         | 5       | 0.67 ( 0.29–1.53)  | Random | 76.1               | 0.002   |
| <b>Cancer type</b>              |         |                    |        |                    |         |
| Solid tumor                     | 13      | 0.61 ( 0.38–0.98)  | Random | 82.4               | 0.000   |
| Leukemia                        | 1       | 0.20 ( 0.06–0.68)  | Random | -                  | -       |
| PC                              | 3       | 0.47 ( 0.33–0.68)  | Fixed  | 0.00               | 0.681   |
| NSCLC                           | 2       | 2.35 ( 1.05–5.24)  | Fixed  | 0.00               | 0.535   |
| CRC                             | 2       | 2.59 ( 1.62–4.14)  | Fixed  | 0.00               | 0.394   |
| <b>Tissue type</b>              |         |                    |        |                    |         |
| FTT                             | 5       | 0.44 (0.33–0.59)   | Fixed  | 48.9               | 0.098   |
| FFPE                            | 3       | 0.48 (0.27–0.84)   | Fixed  | 47.9               | 0.147   |
| Fresh tissue                    | 3       | 0.45 (0.31–0.66)   | Fixed  | 9.7                | 0.330   |
| Tissue (-)                      | 3       | 1.25 (0.24 – 6.43) | Random | 93.8               | 0.000   |
| <b>MicroRNA assay method</b>    |         |                    |        |                    |         |
| qRT-PCR (Taqman)                | 10      | 0.60 (0.32–1.11)   | Random | 86.2               | 0.000   |
| qRT-PCR (SYBR Green)            | 3       | 0.44 (0.30, 0.63)  | Fixed  | 0.0                | 0.482   |
| ISH                             | 1       | 1.56 (0.34, 7.15)  | Random | -                  | -       |
| <b>Anatomy system</b>           |         |                    |        |                    |         |
| Respiratory system              | 3       | 1.13 (0.28–4.53)   | Random | 84.9               | 0.001   |
| Digestive system                | 6       | 0.74 (0.36–1.54)   | Random | 87.3               | < 0.001 |
| Reproduction system             | 2       | 0.31 (0.16–0.58)   | Fixed  | 0.00               | 0.450   |

Abbreviations: miR-494, microRNA-494; HR (Hazard Ratio); CI (Confidence interval); OS, overall survival; PC, pancreatic cancer; NSCLC, non-small cell lung cancer; CRC colorectal carcinoma; FFPE, formalin-fixed paraffin-embedded; FTT, Frozen tumor tissue; “-”, not mentioned.

of miR-494 would potentially predict good OS for patients with digestive system cancer. However, no potential tendency was found in respiratory system neoplasms, with a pooled HR of 1.13 (95% CI: 0.28–4.53;  $I^2 = 84.9\%$ ,  $P = 0.001$ ) (Supplementary Figure 1B, Table 2). We also observed that elevated expression of miR-494 predicted a good OS in reproductive system neoplasms (Supplementary Figure 1C, Table 2), with a pooled HR of 0.31 (95% CI: 0.16–0.58;  $I^2 = 0.0\%$ ,  $P = 0.45$ ).

### Sensitivity analysis

In order to test the stability of our results and further seek out the source of heterogeneity, we carried

out sensitivity analysis (Figure 4, Supplementary Table 1). In the OS analysis of cancer patients, heterogeneity is significant ( $I^2 = 81.7\%$ ,  $P = 0.000$ ). When Sun’s [24], Yang’s [26] and Favarsani’s [25] studies were ruled out from the analysis, the heterogeneity for OS became statistically insignificant ( $I^2 = 0\%$ ,  $P = 0.538$ ) (Supplementary Figure 2A). According to the same method, we found that Sun’s and Yang’s studies were responsible for the heterogeneity of digestive system cancer subgroup (Supplementary Figure 1B, Supplementary Figure 2B) and Asian subgroup (Figure 3A, Supplementary Figure 2C). In addition, when we iteratively removed studies during the process of sensitivity analysis, the pooled result of remaining studies

did not change greatly compared with before, indicating that the entire study was not influenced by any single study (Supplementary Table 1).

### MiR-494 expression and the progress of cancer patients

Given the limited number of studies about the DFS (only two studies) [25–26], PFS (one study) [24] and RFS (one study) [14], we did not combine the HR of PFS, RFS and DFS. We found that elevated expression of miR-494 predicted a shorter DFS in NSCLC (HR = 3.22, 95% CI = 1.02 – 10.2) and CRC (HR = 2.5, 95% CI = 1.23 – 5.07). Additionally, the elevated expression of miR-494 predicted a worse PFS in CRC and a good RFS in AML.

### MiR-494 expression and clinicopathological characteristic

Six studies were enrolled in the clinicopathologic analysis. Among them, five studies assessed the association between miR-494 expression and distant metastasis. We combined odds Ratio (OR) via random-effects model due to significant heterogeneity. The result indicates that elevated expression of miR-494 was negatively correlated with distant metastasis (Supplementary Figure 3A), although no statistical significance was found. We also evaluated the connection between overexpression of miR-494 and lymph node metastasis (Supplementary Figure 3B), TNM stage (Supplementary Figure 3C), and tumor differentiation (Supplementary Figure 3D). The pooled OR were 0.53 (95% CI: 0.14–2.02;  $I^2 = 91.5%$ ,  $P =$

0.000), 0.79 (95% CI: 0.24–2.61;  $I^2 = 88.8%$ ,  $P = 0.000$ ), and 1.06 (95% CI: 0.39–2.87;  $I^2 = 82.3%$ ,  $P = 0.000$ ), respectively, implying that no significant association was revealed between them.

### Assessment of publication bias

Funnel plot, Begg’s test and Egger’s test were employed to assess publication bias of overall survival, the  $P$  value of which were 0.661 and 0.904 respectively. As funnel plot revealed in Figure 5, no significant asymmetry for pooled overall survival was found.

## DISCUSSION

Variation of biomarker in serum or tissue might exert an important influence in the prognosis of cancer patients, and for this reason, great time and energy has been consumed to establish accurate and reliable biomarkers for cancer patients, which could help doctors make more rational decision. In recent years, microRNAs have been regarded as latent prognosis marker for cancer patients considering their distinct expression profile in the cancer patients’ serum and tissue. Furthermore, the expression of microRNAs are more stable than that of mRNA and it can be readily detected by qRT-PCR. Collectively, miRNA has attracted increasing interest among investigators, especially tumor investigators. Among these available miRNAs, miR-494 has been a particularly attractive one.

To our knowledge, this is the first study investigating the relationship between miR-494 high expression and the prognosis in different kinds of cancer. In our study,

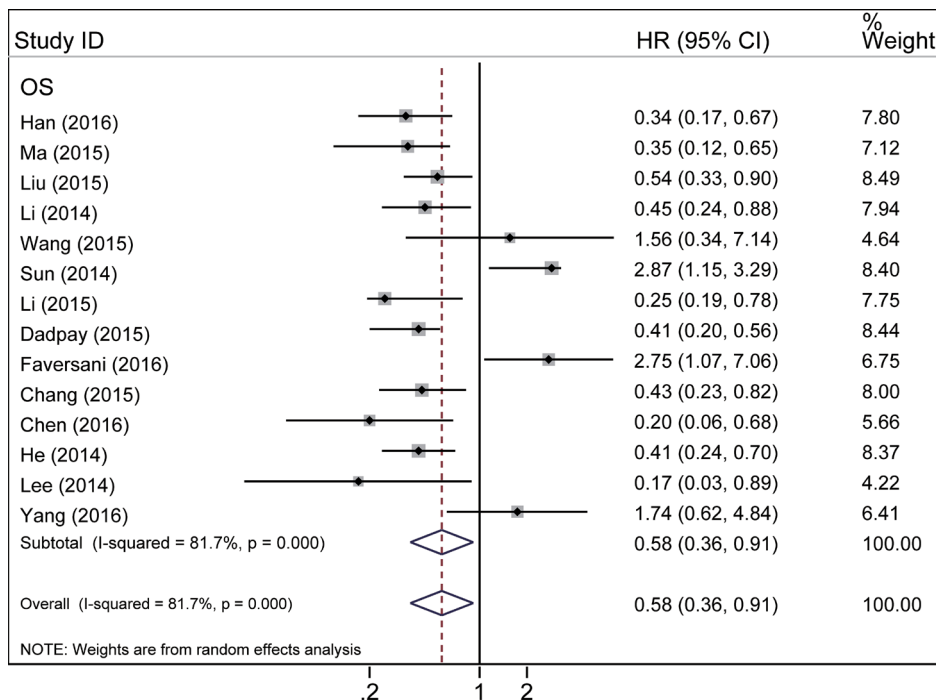

Figure 2: Forest plot of the relationship between miR-494 expression and overall survival in various cancers.

increased expression of miR-494 was found to predict good prognosis in cancer patients, with pooled HR of 0.58 (95% CI: 0.36–0.91;  $I^2 = 81.7\%$ ,  $P = 0.000$ ) (Figure 2, Table 2). In our meta-analysis, most studies showed that miR-494 target oncogenic gene [14–23] and thus suppress the distant metastasis, lymph node metastasis and tumor proliferation (Table 3). We also carried out subgroup analysis of OS to try to seek out the source of heterogeneity and find out the specific correlation between miR-494 high expression and prognosis of different ethnicity (Asian and Caucasian), main pathologic type, cancer type and human body anatomy system series. When we explored the relationship between the expression level of miR-494 and OS in Asian population with cancers, we observed that elevated expression of miR-494 was significantly related to good OS in the Asian subgroup (Figure 3A, Table 2). However, the prognostic value of miR-494 on non-Asian group remains unclear, with a pooled HR of 1.08 (95% CI: 0.18–6.33;  $I^2 = 89.6\%$ ,  $P = 0.002$ ) (Figure 3A, Table 2). Among fourteen studies reporting on OS in ten tumor types, six studies were related to digestive system cancer. Therefore, we performed a subgroup analysis of digestive system cancer. The result did not indicate an

obvious association between high miR-494 expression and digestive system cancer (HR = 0.74, 95% CI: 0.36–1.54) (Supplementary Figure 1B, Table 2), with marked heterogeneity observed in the digestive subgroup ( $I^2 = 87.3\%$ ,  $P = 0.000$ ). However, the trend was positive, which indicates that elevated expression of miR-494 would potentially predict good OS for patients with digestive system cancer. We also conducted a subgroup analysis in the cancers of the respiratory system and reproductive system neoplasms. In reproductive system tumor, the results showed that elevated expression of microRNA-494 predicted good OS for cancer patients (Supplementary Figure 1C, Table 2). In contrast, there was no statistically significant associations found in respiratory system cancer (Supplementary Figure 1B, Table 2). Additionally, subgroup analysis was also conducted according to the main pathological types, tissue preservation method and microRNA assay method. There was significant association was found between elevated expression of miR-494 and good OS of FTT subgroup, FFPE subgroup and Fresh tissue (Figure 3D). In the subgroup analysis of microRNA assay method, we found elevated expression of microRNA-494 predicted a good OS in SYBR Green

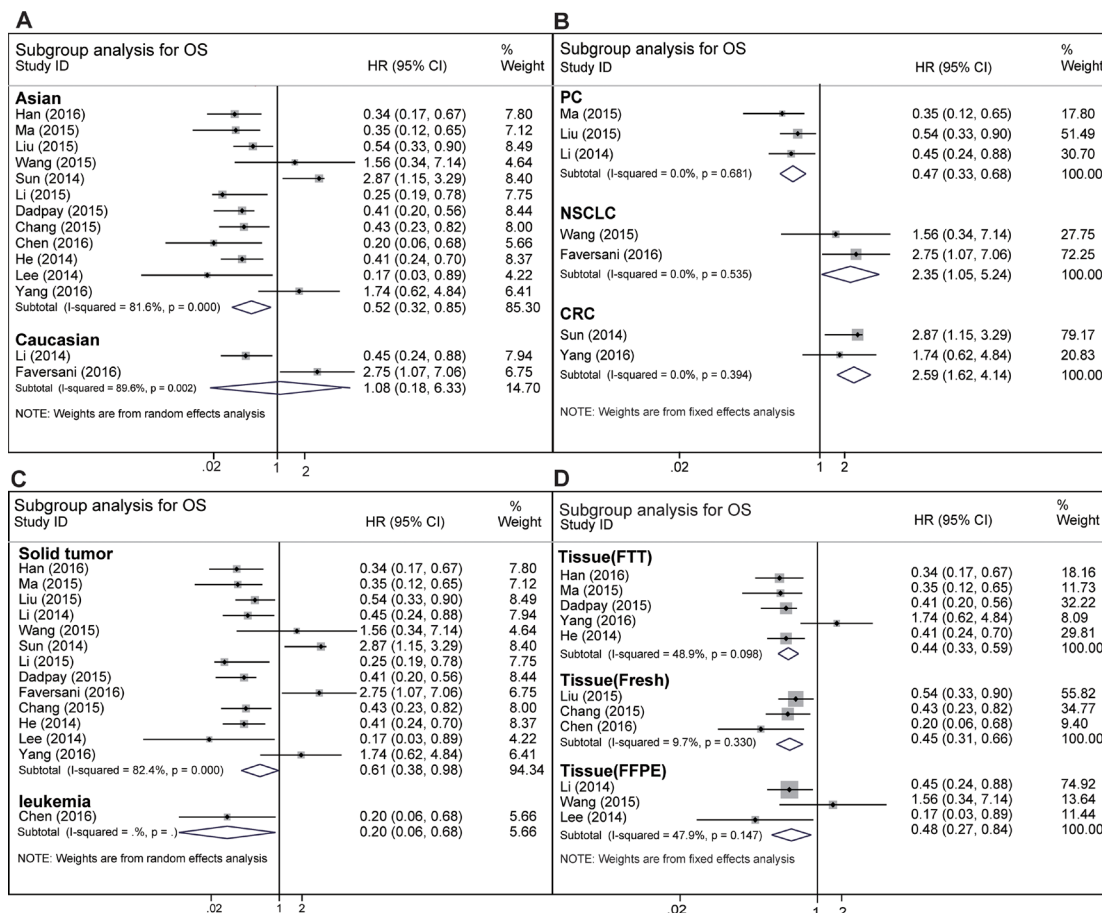

**Figure 3: Subgroup analysis of overall survival.** (A) Subgroup analysis of overall survival for Asian or Caucasian cancer patients. (B) Subgroup analysis of overall survival for different cancer type. (C) Subgroup analysis of overall survival in solid tumor and leukemia. (D) subgroup analysis of overall survival in different tissue type (FFPE, FTT, Fresh tissue).

**Table 3: The validated target genes of miR-494 in the eligible studies in this meta-analysis**

| Study      | Year | Type of cancer                         | Validated target genes |
|------------|------|----------------------------------------|------------------------|
| Chen [14]  | 2016 | Acute Myeloid Leukemia                 | c-Myc                  |
| Li [23]    | 2015 | Chondrosarcoma                         | SOX9                   |
| Sun [24]   | 2014 | Colorectal cancer                      | PTEN                   |
| Wang [27]  | 2015 | Non-small cell lung cancer             | PTEN                   |
| Li [34]    | 2015 | Epithelial ovarian carcinoma           | IGF1R                  |
| Han [21]   | 2016 | Ovarian cancer                         | CUL4A                  |
| Chang [15] | 2015 | Head and neck squamous cell carcinomas | Bmi 1, ADAM10          |
| Liu [20]   | 2015 | Pancreatic cancer                      | c-Myc, SIRT1           |
| Li [19]    | 2014 | Pancreatic cancer                      | FOXM 1                 |
| He [17]    | 2014 | Gastric carcinoma                      | c-Myc                  |

Abbreviations: SOX9, SRY-related high mobility group-Box gene 9; PTEN, phosphatase and tensin homolog deleted on chromosome ten; IGF1R, insulin-like growth factor 1 receptor; CUL4A, Cullin 4A; Bmi 1, B-cell-specific moloney leukemia virus insert site 1; ADAM10, A disintegrin and metalloproteinase 10; SIRT1, Sirtuin Type 1; Foxm1, Forkhead box protein M1.

qRT-PCR subgroup (Supplementary Figure 5B). However, no obvious association was found in adenocarcinoma subgroup, squamous-cell carcinoma subgroup (Table 2, Supplementary Figure 1A), unclear tissue preservation subgroup (Supplementary Figure 4), taqman qRT-PCR subgroup and ISH subgroup (Supplementary Figure 5).

To eliminate the effect of different mechanism which was induced by the process of tumor formation and tumor progression among various cancers, we conducted a subgroup analysis according to the cancer type. It was noted that increased expression of miR-494 was strongly correlated with good OS (HR = 0.47, 95% CI: 0.33–0.68;  $I^2 = 0.0%$ ,  $P = 0.681$ ) in PC (Figure 3B, Table 2). It may be because miR-494 high expression suppressed the tumor cell monolayer proliferation, colony formation and tumorsphere formation by negatively regulating the expression of FOXM1. Accordingly, the expression level of miR-494 in tissue or serum was regarded as a promising biomarker for prognosis of PC [19]. However, we draw an entirely contrary conclusion to most studies in NSCLC (Figure 3B, Table 2) subgroup where increased expression of miR-494 predicted obvious worse survival rate. Giulia-Romano found that the increased expression of miR-494 lead to the Tumor necrosis factor Related Apoptosis-Inducing Ligand (TRAIL) resistance in NSCLC via down regulation of BCL2L11, which may inhibit the apoptosis and promote the tumorigenicity of tumor cells [28]. Researchers, therefore, consider miR-494 to play a significant part in promoting tumor formation and death of NSCLC. As shown in Figure 3B, elevated expression of miR-494 also predicted a worse outcome in CRC. It can be hypothesized that elevated expression of miR-494 promotes the invasion and migration of tumor cells by targeting PTEN, which was one of the most frequently mutated tumor suppressor genes in human cancer and may result in shorter survival rate in CRC [24]. We also find

that elevated expression of miR-494 predicted a shorter DFS in NSCLC (HR = 3.22, 95% CI = 1.02 – 10.2) and CRC (HR = 2.5, 95% CI = 1.23 – 5.07). It was obvious that high expression of miR-494 predicted a good OS in the solid tumor and leukemia as per the cancer type (Figure 3C, Table 2). We also observed that increased expression of miR-494 forecast good OS in OC, HNSCC, NPC, AML, GC and CC. Through the subgroup analysis, the heterogeneity of some subgroup analysis remains huge still, so the subgroup analysis could not elucidate the source of heterogeneity clearly. In order to further seek out the source of heterogeneity, sensitivity analysis was conducted. According to the sensitivity analysis, Sun's, Yang's and Favarsani's studies lay behind the source of heterogeneity for OS analysis. When we removed these studies from current studies, the heterogeneity became insignificant ( $I^2 = 0.0%$ ,  $P = 0.538$ ) (Supplementary Figure 2A). Compared with most studies in this meta-analysis, these studies showed the opposite outcome that miR-494 high expression predicted a worse outcome of cancer, which may cause fairly large heterogeneity in current research. Using the same method, we conducted a sensitivity analysis in the Asian group and digestive group, and we found that the Sun's and Yang's study were responsible for the heterogeneity of this two groups. When we removed these studies in these two groups, the heterogeneity became insignificant (Supplementary Figure 2C, Supplementary Figure 2B). When we removed one study at a time from all eligible studies during the process of sensitivity analysis, no single study obviously affected the entire pooled result (Figure 4, Supplementary Table 1), which indicates that the result is stable. Additionally, the elevated expression of miR-494 predicted a worse PFS in CRC and a good RFS in AML.

Furthermore, we conducted an analysis between the expression of miR-494 and clinicopathologic factors.

Elevated expression of miR-494 was negatively associated with distant metastasis, which suggested that elevated expression of miR-494 might suppress distant metastasis of cancer patients (Supplementary Figure 3A), although no obvious statistical significance was found between them. Meanwhile, no statistically significant relationship were found between the high expression of miR-494 and TNM stage (Supplementary Figure 3C), tumor differentiation (Supplementary Figure 3D), and lymph node metastasis (Supplementary Figure 3B). As the number of studies about the association between the expression of miR-494 and clinicopathologic factors was limited, more related articles will be needed to conduct further investigation.

It's interesting that high expression of miR-494 predicted a good OS of cancer patients, but no significant association was found in clinicopathologic characteristics. Additionally, the prognostic value of miR-494 in Asian and Caucasian are not consistent. In cancer, miR-494 act as tumor suppressors or promoter depending on their target gene. If the target gene of miR-494 involved in cell differentiation or as tumor suppressors, microRNA bind to complementary sequences of mRNA at the 3'-untranslated region and lead to mRNA degradation or translational repression [4, 5], the miR-494 act as oncogenes [35]. Similarly, microRNAs act as tumor suppressors [35] when they downregulate different proteins with oncogenic activity. In our meta-analysis, most studies showed that miR-494 act as tumor suppressors and their high expression predicted a good OS [14–23]. While a few studies reported inconsistent results [24–27], indicating miR-494 maybe a tumor promoter. The reason is that miR-494 regulate different target genes in different cancer type (Table 3). The limited research of Caucasians

(two studies) and clinicopathologic characteristics (six studies) make the result easily affected, which means any single study might affect the entire result. From the Supplementary Figure 3 we could find that the result was affected most by Sun's [24] and Wang's [27] study, which target same carcinostatic genes PTEN (Table 3) and downregulate PTEN, thus promoting the progress of tumor. Besides that, the limit of language (only in English) makes it impossible to get more studies. On the other hand, the cancer type varies in different subgroup (Asian and Caucasians, different clinicopathological characteristic), but miR-494 downregulate different target genes in different cancer type (Table 3), thus result in the different prognosis and affected the conclusion in subgroup. Although no significant association was found between miR-494 expression and clinicopathological characteristic (Supplementary Figure 3), the trend of most result were positive (three out of four), which indicates that high expression of miR-494 negatively relate to distant metastasis, lymph node metastasis and TNM stage. So It is reasonable for us to get these conclusions, but we should treat the conclusion cautiously before we apply it in some specific tumor type and specific subgroup, unless we have demonstrated it in large number of studies.

Although great efforts have been made to minimize errors, several limits persist in this article. First, the HRs of some articles were extracted and calculated from survival curves, which might deviate from the original values, even slightly. Second, we don't have access to miR-494 expression data of global populations, which makes it hard to set a standard cut-off. so the cut-off values of miR-494 expression are not consistent among included studies, which makes it hard to set a consistent

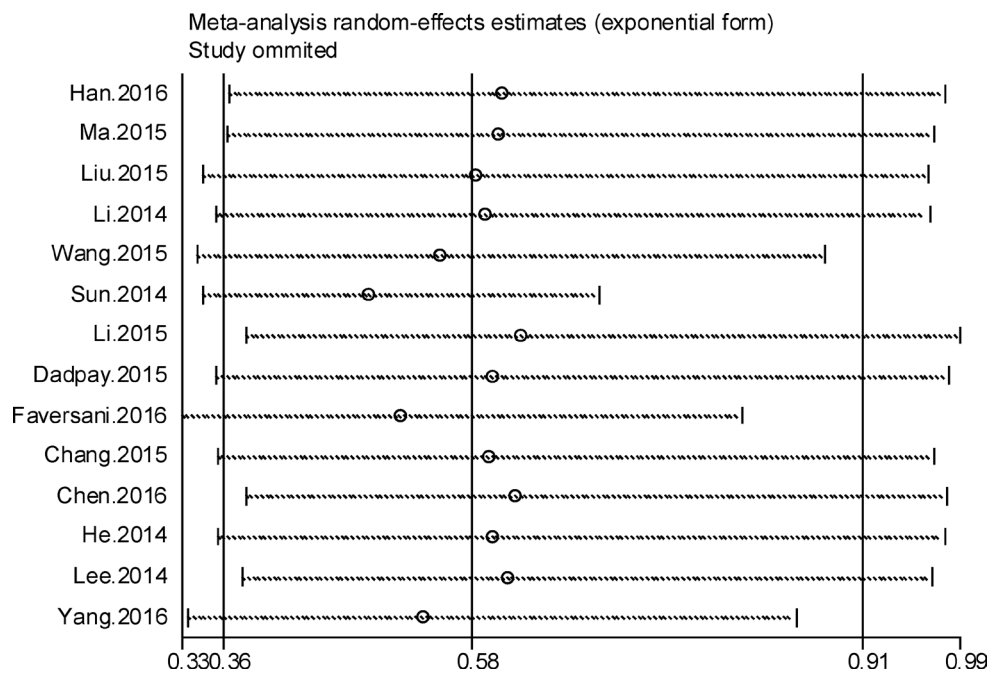

Figure 4: Forest plot of sensitivity analysis for overall survival.



criteria for high expression and makes our conclusion less persuasive. Third, most sample included in this meta-analysis were tissue, little in serum or urine. Compared with tissue, circulating biomarkers or urine are easier to be accepted by patients and more convenient for permanent monitoring. Forth, because of the limited research for each cancer type, more related studies will be needed to confirm the correlation between miR-494 expression level and prognosis of various types of cancer. Fifth, there exists relatively large heterogeneity in this meta-analysis ( $I^2 = 81.7\%$ ,  $P = 0.000$ ). According to the sensitivity analysis, the heterogeneity mainly came from Sun's, Yang's, and Faversoni's study. When we removed them from this meta-analysis, the adjusted HR was 0.40, and the heterogeneity become insignificant ( $I^2 = 0.0\%$ ,  $P = 0.538$ ). Besides, different detection methods, sample sources, preservation of tumor tissue, microRNA assay method and cut-off values may also have affected the effectiveness of miR-494 as a predictive biomarker, causing relatively large heterogeneity. Additionally, a panel of miRNAs may be a stronger predictor for prognosis than a single miRNA, which ought to be relatively cheap and have high specificity and sensitivity. In the current research, neither Begg's test nor Egger's test showed significant publication bias for overall survival.

Despite the limits described above, our study clearly demonstrates that elevated expression of miR-494 is correlated with good overall survival in cancer patients, especially in Asian people and pancreatic cancer. Whereas in NSCLC and CRC, elevated expression of miR-494 predicted a short overall survival time. Multicenter, and large sample studies are still lacking to further validate these conclusions, and more clinical studies ought to be

carried out before the application of the prognostic value of miR-494 in cancer, especially for any single type of cancer.

## MATERIALS AND METHODS

### Search strategy

We comprehensively searched Embase, PubMed, Web of Science databases from 1966 to April 1st, 2017. The literature was published during the period of time, grey literature was not found during our meta-analysis. The keywords employed in searching were “mir-494 OR microrna-494 OR mirna-494 OR hsa-mir-494” AND “tumor OR cancer OR carcinoma OR neoplasm”. To get some raw data which was not mentioned in the articles, we contacted some of the authors to get a more accurate result. Relevant references of review articles about miR-494 were also searched by hand and carefully read by us to obtain more studies. In addition, we separately conducted the search and articles inclusion based on a common set of criteria, and we settled our divergence in opinion by discussion among ourselves.

### Inclusion and exclusion criteria

We conducted this meta-analysis on the basis of PRISMA (Preferred Reporting Items for Systematic Reviews and Meta-Analysis) statement. Studies were enrolled in this research if they satisfy the following conditions: (i) patients involved in this meta-analysis must be diagnosed with cancer via pathology; (ii) The method for detecting the expression of miR-494 must be q-PCR or ISH; (iii) The correlation between miR-494 expression and

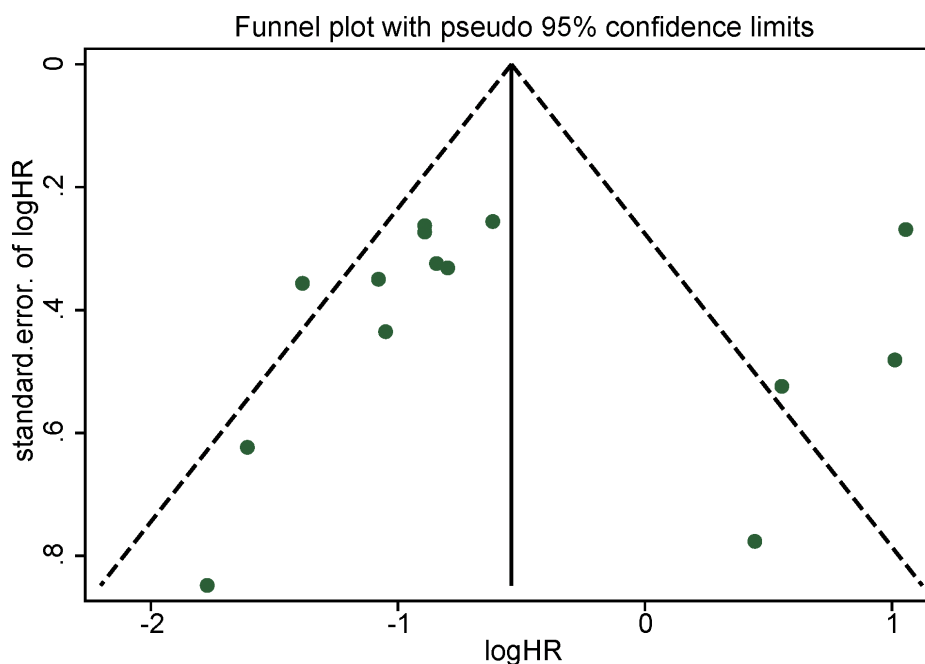

Figure 5: Funnel plot for publication bias in overall survival.

prognosis or clinicopathological features was investigated; (iv) The HR and its 95% CI for OS on the basis of miR-494 expression level were readily available or could be calculated indirectly; (v) When any single study patient sample source was used in several studies, we chose the most representative and most accurate study to avoid unnecessary cohort overlapping. In addition, studies that have already satisfied the abovementioned inclusion requirements were further ruled out if they had any of the following flaws: (i) duplicated articles or data; (ii) not human studies; (iii) review articles or letters; (iv) lack of sufficient data or information to get HR; (v) articles not written in English.

## Quality assessment

We systematically assessed the quality of eligible studies per the critical checklist of the Dutch Cochrane Centre, which was proposed by MOOSE [29, 30]. The key points of the quality assessment contained clear description of the following: (i) the main ethnic background and country; (ii) the cancer type; (iii) outcome assessment; (iv) the detection method of miR-494; (v) cut-off value; (vi) adequate follow-up time. We excluded articles which missed any of the aforementioned key points.

## Data extraction and quality assessment

The full texts of eligible studies were carefully read by us, then we extracted the following data independently: (i) the first author (ii) publication year; (iii) characteristics of the studies, which comprise the patients' nationality, sample size, tumor type, and clinicopathological characteristics; (iv) the assay method and cut-off value of miR-494; (v) HRs of miR-494 expression for OS, recurrence-free survival (RFS), disease-free survival (DFS), progression-free survival (PFS); (vi) if the HR for OS, PFS, DFS, and RFS were calculated by both univariate and multivariate analyses, the latter was our first choice, given that these results were adjusted for confounding factors. If a study did not report the HR directly, the method described by Parmar et al. [31] and Tierney et al. [32] was employed to estimate HR and their corresponding 95% CI. We recovered the data of Kaplan-Meier curves via the Engauge Digitizer and calculated the HR and its 95% CI according to the method described above, and we repeated this process three times to reduce variability. We resolved divergence by discussion among ourselves, until consensus was reached regarding the extraction and interpretation of all data.

## Statistical analysis

All the HRs and their 95% CIs were combined to evaluate the effect of miR-494 high expression to

prognosis. Generally, if the pooled HR < 1 and their 95% CI did not overlap the invalid line in the forest, the high expression of miR-494 predicted a good OS. If the 95% CI overlapped the invalid line, the combined HR remained insignificant. Otherwise, the combined HR predicted a worse OS. The heterogeneity of pooled result was checked via Cochran's  $Q$  test and Higgins'  $I^2$ -squared, and it was defined as  $P < 0.1$  or  $I^2 > 50\%$ . If  $P > 0.1$  and  $I^2 < 50\%$ , we ignored the influence of heterogeneity and a fixed effects model was employed to pool the overall result, otherwise the random effects model was employed. The potential publication bias was assessed by funnel plot, Begg's and Egger's test (if  $P < 0.05$ , publication bias was statistically significant) [33]. Sensitivity analysis, by means of iteratively removing each study, was employed to evaluate the stability of the results. A  $p$ -value less than 0.05 was considered to be statistically significant.

## Abbreviations

miRNA-494/miR-494, microRNA-494; HR, hazard ratio; CI, confidence interval; NR, not reported; qRT-PCR, quantitative real-time polymerase chain reaction; OS, overall survival; PC, pancreatic cancer; OC, ovarian cancer; NSCLC, non-small lung cancer; CRC, colorectal carcinoma; AML, Acute myeloid leukemia; NPC, nasopharyngeal carcinoma; GC, gastric cancer; CC, cervical cancer; EOC, Epithelial ovarian cancer; HNSCC, Head and neck squamous cell carcinoma; CS, chondrosarcoma; ISH, *in situ* hybridization; SC, survival curve; PFS, progress free survival; DFS, disease free survival; RFS, recurrence free survival; FFPE, formalin-fixed paraffin-embedded; FTT, Frozen tumor tissue; "-", not mentioned.

## Author contributions

Participated in research design: Zhenxian Xiang, Chunxiao Zhang, and Bin Xiong. Performed data analysis: Zhenxian Xiang, Chunxiao Zhang, and Zewei Yuan. Wrote or contributed to the writing of the manuscript: Zhenxian Xiang and Min Sun.

## ACKNOWLEDGMENTS AND FUNDING

The analysis was supported by National Natural Science Foundation of China (Grant No. 81572874). We would like to acknowledge Sze Ka Lun, Liang Zhen, Shuyi Wang and Kun Zou for their technical assistance and rational suggestion.

## CONFLICTS OF INTEREST

The authors declare no conflicts of interest.

## REFERENCES

1. Jemal A, Bray F, Center MM, Ferlay J, Ward E, Forman D. Global cancer statistics. *CA Cancer J Clin.* 2011; 61:69–90. <https://doi.org/10.3322/caac.20107>.
2. Siegel RL, Miller KD, Jemal A. Cancer statistics, 2016. *CA Cancer J Clin.* 2016; 66:7–30. <https://doi.org/10.3322/caac.21332>.
3. Chen W, Zheng R, Baade PD, Zhang S, Zeng H, Bray F, Jemal A, Yu XQ, He J. Cancer statistics in China, 2015. *CA Cancer J Clin.* 2016; 66:115–32. <https://doi.org/10.3322/caac.21338>.
4. Bartel DP, Chen CZ. Micromanagers of gene expression: the potentially widespread influence of metazoan microRNAs. *Nat Rev Genet.* 2004; 5:396–400. <https://doi.org/10.1038/nrg1328>.
5. Bartel DP. MicroRNAs: genomics, biogenesis, mechanism, and function. *Cell.* 2004; 116:281–97. [https://doi.org/10.1016/S0092-8674\(04\)00045-5](https://doi.org/10.1016/S0092-8674(04)00045-5).
6. Lee RC, Feinbaum RL, Ambros V. The *C. elegans* heterochronic gene *lin-4* encodes small RNAs with antisense complementarity to *lin-14*. *Cell.* 1993; 75:843–54. [https://doi.org/10.1016/0092-8674\(93\)90529-Y](https://doi.org/10.1016/0092-8674(93)90529-Y).
7. Siegel R, Naishadham D, Jemal A. Cancer statistics, 2012. *CA Cancer J Clin.* 2012; 62:10–29. <https://doi.org/10.3322/caac.20138>.
8. Iorio MV, Croce CM. MicroRNA dysregulation in cancer: diagnostics, monitoring and therapeutics. A comprehensive review. *EMBO Mol Med.* 2012; 4:143–59. <https://doi.org/10.1002/emmm.201100209>.
9. Okumura T, Shimada Y, Moriyama M, Takei Y, Omura T, Sekine S, Nagata T, Shimizu K, Tsukada K. MicroRNA-203 inhibits the progression of esophageal squamous cell carcinoma with restored epithelial tissue architecture *in vivo*. *Int J Oncol.* 2014; 44:1923–32. <https://doi.org/10.3892/ijo.2014.2365>.
10. Mei Z, He Y, Feng J, Shi J, Du Y, Qian L, Huang Q, Jie Z. MicroRNA-141 promotes the proliferation of non-small cell lung cancer cells by regulating expression of PHLPP1 and PHLPP2. *FEBS Lett.* 2014; 588:3055–61. <https://doi.org/10.1016/j.febslet.2014.06.020>.
11. Zhang W, Liu J, Wang G. The role of microRNAs in human breast cancer progression. *Tumour Biol.* 2014; 35:6235–44. <https://doi.org/10.1007/s13277-014-2202-8>.
12. Ishiguro H, Kimura M, Takeyama H. Role of microRNAs in gastric cancer. *World J Gastroenterol.* 2014; 20:5694–9. <https://doi.org/10.3748/wjg.v20.i19.5694>.
13. Zhao JJ, Yang J, Lin J, Yao N, Zhu Y, Zheng J, Xu J, Cheng JQ, Lin JY, Ma X. Identification of miRNAs associated with tumorigenesis of retinoblastoma by miRNA microarray analysis. *Childs Nerv Syst.* 2009; 25:13–20. <https://doi.org/10.1007/s00381-008-0701-x>.
14. Tian C, Zheng G, Zhuang H, Li X, Hu D, Zhu L, Wang T, You MJ, Zhang Y. MicroRNA-494 Activation Suppresses Bone Marrow Stromal Cell-Mediated Drug Resistance in Acute Myeloid Leukemia Cells. *J Cell Physiol.* 2017; 232:1387–95. <https://doi.org/10.1002/jcp.25628>.
15. Chang YC, Jan CI, Peng CY, Lai YC, Hu FW, Yu CC. Activation of microRNA-494-targeting Bmi1 and ADAM10 by silibinin ablates cancer stemness and predicts favourable prognostic value in head and neck squamous cell carcinomas. *Oncotarget.* 2015; 6:24002–16. <https://doi.org/10.18632/oncotarget.4365>.
16. Dadpay M, Zarea M, Rabati RG, Rezakhaniha B, Barari B, Behnod V, Ziari K. RETRACTED ARTICLE: Upregulation of miR-21 and downregulation of miR-494 may serve as emerging molecular biomarkers for prediagnostic samples of subjects who developed nasopharyngeal carcinoma associates with lymph node metastasis and poor prognosis. *Tumour Biol.* 2015. <https://doi.org/10.1007/s13277-015-3905-1>.
17. He W, Li Y, Chen X, Lu L, Tang B, Wang Z, Pan Y, Cai S, He Y, Ke Z. miR-494 acts as an anti-oncogene in gastric carcinoma by targeting c-myc. *J Gastroenterol Hepatol.* 2014; 29:1427–34. <https://doi.org/10.1111/jgh.12558>.
18. Ma YB, Li GX, Hu JX, Liu X, Shi BM. Correlation of miR-494 expression with tumor progression and patient survival in pancreatic cancer. *Genet Mol Res.* 2015; 14:18153–9. <https://doi.org/10.4238/2015.December.23.2>.
19. Li L, Li Z, Kong X, Xie D, Jia Z, Jiang W, Cui J, Du Y, Wei D, Huang S, Xie K. Down-regulation of microRNA-494 via loss of SMAD4 increases FOXM1 and beta-catenin signaling in pancreatic ductal adenocarcinoma cells. *Gastroenterology.* 2014; 147:485–97.e18. <https://doi.org/10.1053/j.gastro.2014.04.048>.
20. Liu Y, Li X, Zhu S, Zhang JG, Yang M, Qin Q, Deng SC, Wang B, Tian K, Liu L, Niu Y, Wang CY, Zhao G. Ectopic expression of miR-494 inhibited the proliferation, invasion and chemoresistance of pancreatic cancer by regulating SIRT1 and c-Myc. *Gene Ther.* 2015; 22:729–38. <https://doi.org/10.1038/gt.2015.39>.
21. Han X, Fang Z, Wang H, Jiao R, Zhou J, Fang N. CUL4A functions as an oncogene in ovarian cancer and is directly regulated by miR-494. *Biochem Biophys Res Commun.* 2016; 480:675–81. <https://doi.org/10.1016/j.bbrc.2016.10.114>.
22. Lee H, Kim KR, Cho NH, Hong SR, Jeong H, Kwon SY, Park KH, An HJ, Kim TH, Kim I, Yoon HK, Suh KS, Min KO, et al. MicroRNA expression profiling and Notch1 and Notch2 expression in minimal deviation adenocarcinoma of uterine cervix. *World J Surg Oncol.* 2014; 12:334. <https://doi.org/10.1186/1477-7819-12-334>.
23. Li J, Wang L, Liu Z, Zu C, Xing F, Yang P, Yang Y, Dang X, Wang K. MicroRNA-494 inhibits cell proliferation and invasion of chondrosarcoma cells *in vivo* and *in vitro* by directly targeting SOX9. *Oncotarget.* 2015; 6:26216–29. <https://doi.org/10.18632/oncotarget.4460>.
24. Sun HB, Chen X, Ji H, Wu T, Lu HW, Zhang Y, Li H, Li YM. miR494 is an independent prognostic factor and promotes cell migration and invasion in colorectal cancer

- by directly targeting PTEN. *Int J Oncol.* 2014; 45:2486–94. <https://doi.org/10.3892/ijo.2014.2665>.
25. Favarsani A, Amatori S, Augello C, Colombo F, Porretti L, Fanelli M, Ferrero S, Palleschi A, Pelicci PG, Belloni E, Ercoli G, Degrassi A, Baccarin M, et al. miR-494-3p is a novel tumor driver of lung carcinogenesis. *Oncotarget.* 2017; 8:7231–47. <https://doi.org/10.18632/oncotarget.13933>.
  26. Yang IP, Tsai HL, Miao ZF, Huang CW, Kuo CH, Wu JY, Wang WM, Juo SH, Wang JY. Development of a deregulating microRNA panel for the detection of early relapse in postoperative colorectal cancer patients. *J Transl Med.* 2016; 14:108. <https://doi.org/10.1186/s12967-016-0856-2>.
  27. Wang J, Chen H, Liao Y, Chen N, Liu T, Zhang H, Zhang H. Expression and clinical evidence of miR-494 and PTEN in non-small cell lung cancer. *Tumour Biol.* 2015; 36:6965–72. <https://doi.org/10.1007/s13277-015-3416-0>.
  28. Romano G, Acunzo M, Garofalo M, Di Leva G, Cascione L, Zanca C, Bolon B, Condorelli G, Croce CM. MiR-494 is regulated by ERK1/2 and modulates TRAIL-induced apoptosis in non-small-cell lung cancer through BIM down-regulation. *Proc Natl Acad Sci USA.* 2012; 109:16570–5. <https://doi.org/10.1073/pnas.1207917109>.
  29. Hong L, Han Y, Yang J, Zhang H, Jin Y, Brain L, Li M, Zhao Q. Prognostic value of epidermal growth factor receptor in patients with gastric cancer: a meta-analysis. *Gene.* 2013; 529:69–72. <https://doi.org/10.1016/j.gene.2013.07.106>.
  30. Stroup DF, Berlin JA, Morton SC, Olkin I, Williamson GD, Rennie D, Moher D, Becker BJ, Sipe TA, Thacker SB. Meta-analysis of observational studies in epidemiology: a proposal for reporting. Meta-analysis Of Observational Studies in Epidemiology (MOOSE) group. *Jama.* 2000; 283:2008–12. <https://doi.org/10.1001/jama.283.15.2008>.
  31. Parmar MK, Torri V, Stewart L. Extracting summary statistics to perform meta-analyses of the published literature for survival endpoints. *Stat Med.* 1998; 17:2815–34. [https://doi.org/10.1002/\(SICI\)1097-0258\(19981230\)17:24<2815::AID-SIM110>3.0.CO;2-8](https://doi.org/10.1002/(SICI)1097-0258(19981230)17:24<2815::AID-SIM110>3.0.CO;2-8).
  32. Tierney JF, Stewart LA, Ghersi D, Burdett S, Sydes MR. Practical methods for incorporating summary time-to-event data into meta-analysis. *Trials.* 2007; 8:16. <https://doi.org/10.1186/1745-6215-8-16>.
  33. Egger M, Davey Smith G, Schneider M, Minder C. Bias in meta-analysis detected by a simple, graphical test. *Bmj.* 1997; 315:629–34. <https://doi.org/10.1136/bmj.315.7109.629>.
  34. Li N, Zhao X, Wang L, Zhang S, Cui M, He J. miR-494 suppresses tumor growth of epithelial ovarian carcinoma by targeting IGF1R. *Tumour Biol.* 2016; 37:7767–76. <https://doi.org/10.1007/s13277-015-4603-8>.
  35. Shenouda SK, Alahari SK. MicroRNA function in cancer: oncogene or a tumor suppressor? *Cancer Metastasis Rev.* 2009; 28:369–78. <https://doi.org/10.1007/s10555-009-9188-5>.
